# Supplementary material for: Understanding the potential bias of variance components estimators when using genomic models
Source: Springer Nature journal article supplement (doi:10.1186/s12711-018-0411-0), 2018-08-06

### Supplementary Figure 3

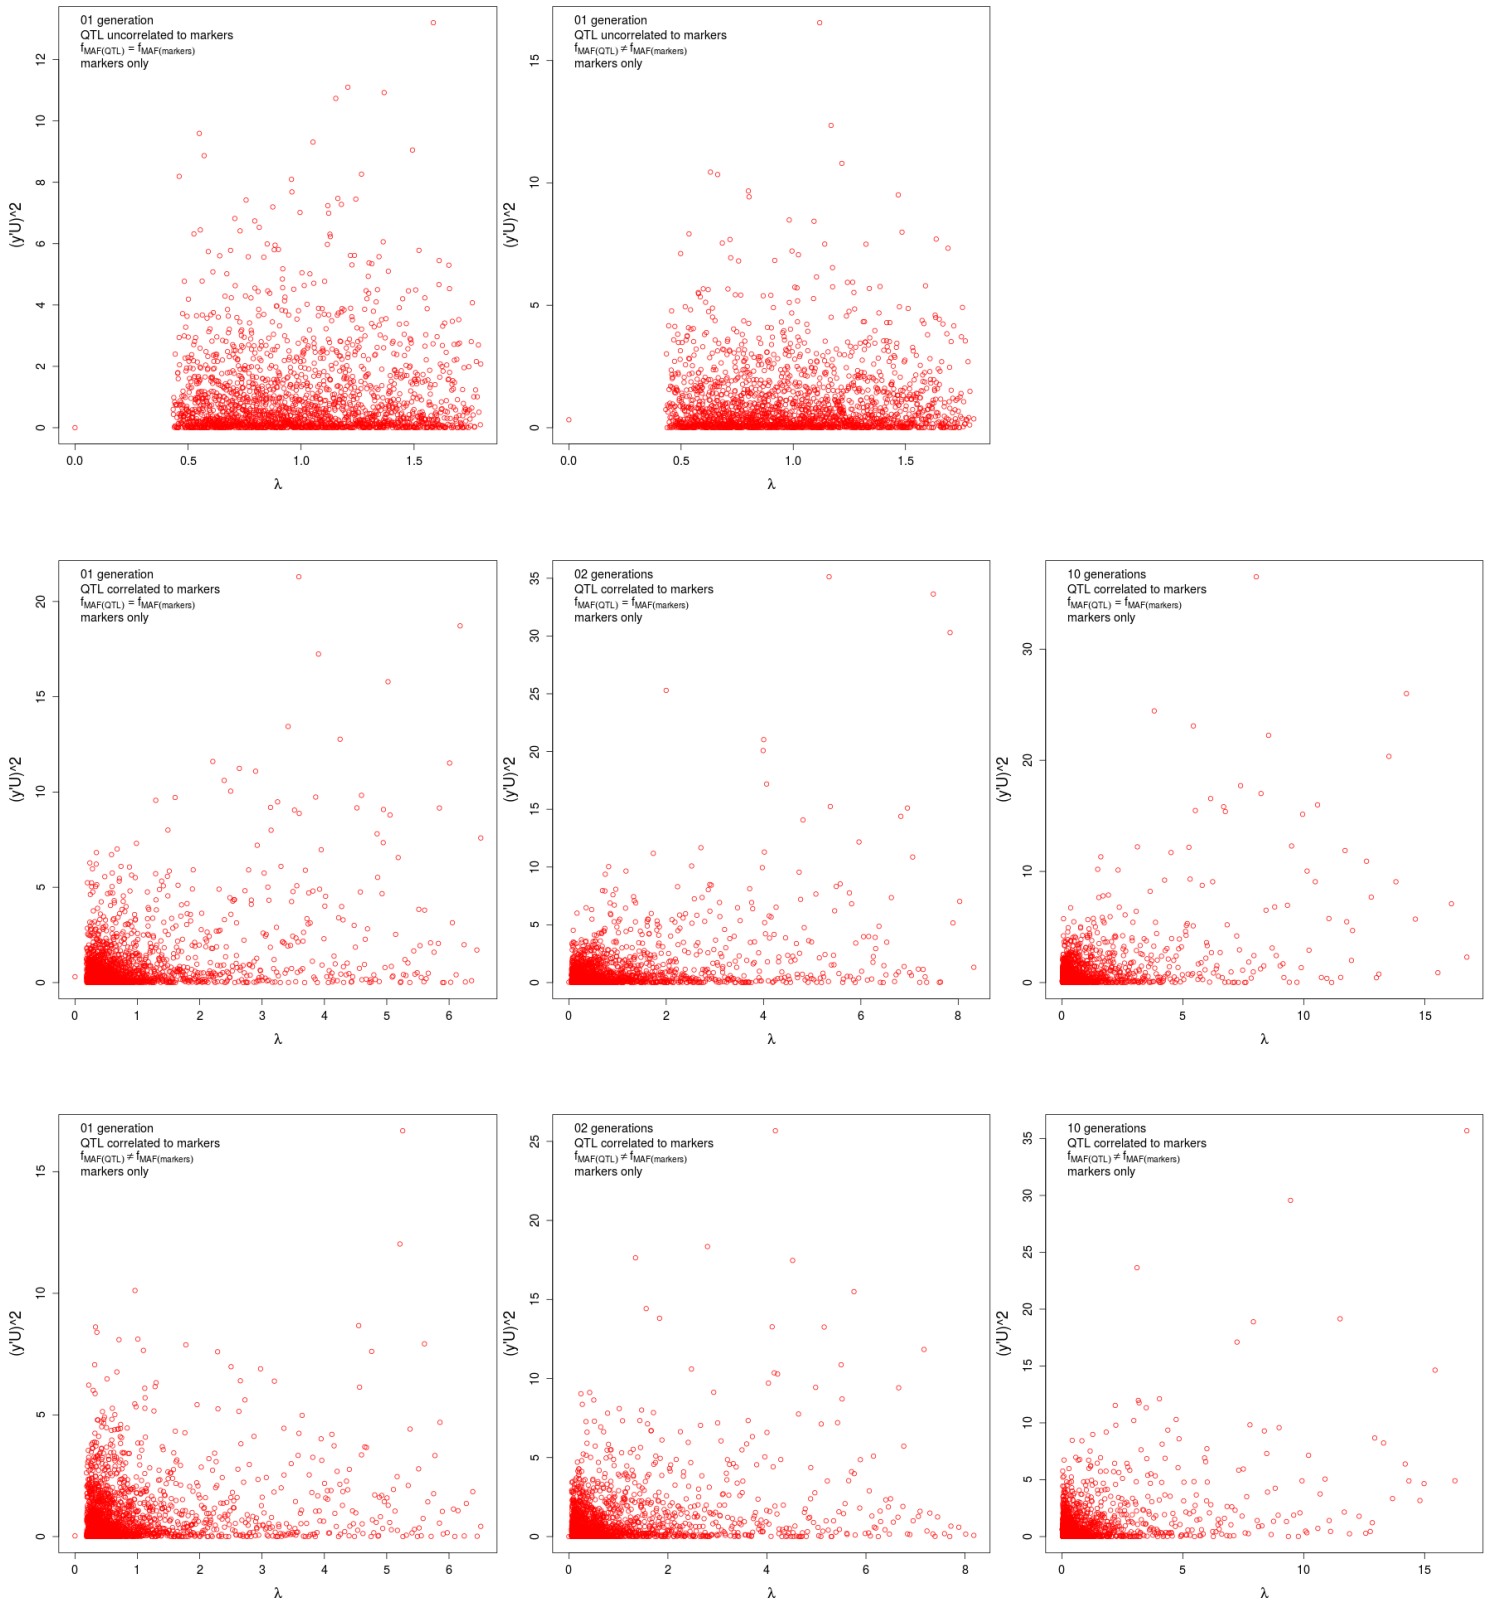

Supplement: MOESM3 [file 12711_2018_411_MOESM3_ESM.pdf]
