# Supplementary material for: Understanding the potential bias of variance components estimators when using genomic models
Source: Springer Nature journal article supplement (doi:10.1186/s12711-018-0411-0), 2018-08-06

Supplementary Figure 7

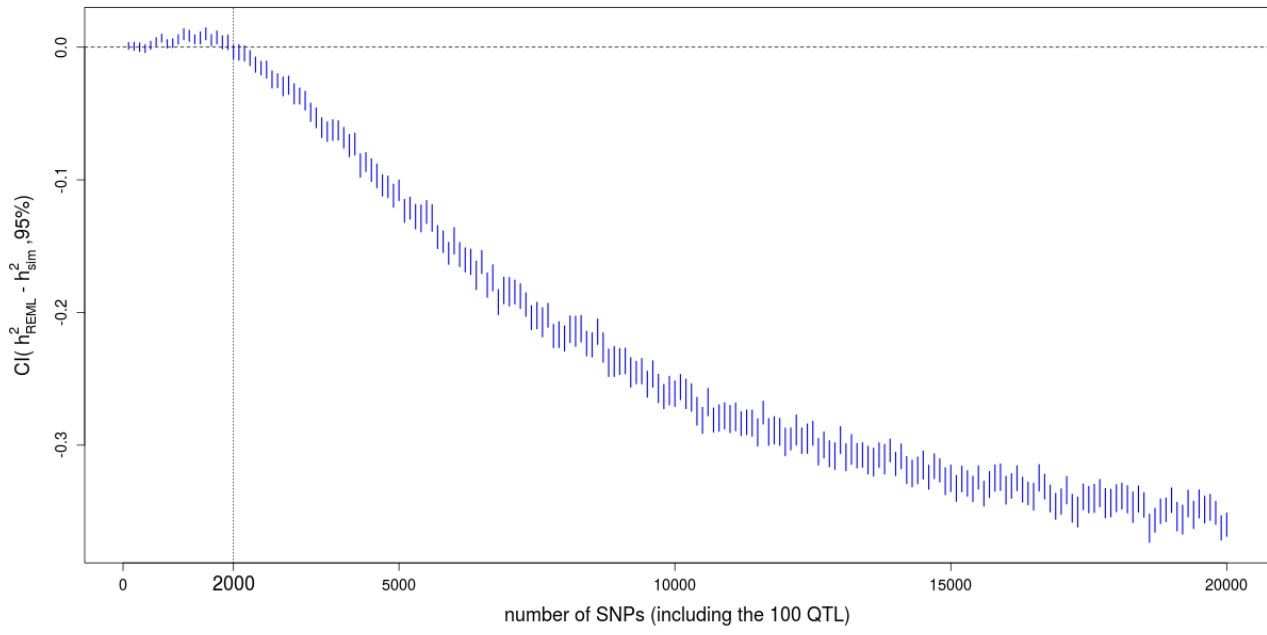

Supplement: MOESM7 [file 12711_2018_411_MOESM7_ESM.pdf]
